# Supplementary material for: NeuroD1 regulation of migration accompanies the differential sensitivity of neuroendocrine carcinomas to TrkB inhibition
Source: PubMed Central journal article supplement — Oncogenesis. 2013 Aug 19;2(8):e63–. doi: 10.1038/oncsis.2013.24 (PMC3759124; doi:10.1038/oncsis.2013.24), 2013-08-19

**Supplemental Tables 1 and 2. Genes whose up- or down regulation best correlates with NeuroD1 expression with a correlation p-value of 0.001.**

Tables of genes from microarray that correlate with NeuroD1 expression with P value of 0.001.

Table 1 lists up-regulated genes. Table 2 lists down-regulated genes.

**Supplemental Figures**

**Figure 1. Expression in melanoma with mutant p53 and luciferase assays.**

a) Melanoma cells were lysed and immunoblotted for TrkB, synaptophysin NeuroD1 and GAPDH was loading the control. b) HBEC3-KT and HBEC3-KT53 were transfected with a pGL3-NeuroD1-luciferase construct and luciferase activity was measured.

**Figure 2. NeuroD1 and TrkB knockdown for Brdu**

a) NeuroD1 was transiently knocked down in prostate and melanoma cell lines. Lysates were immunoblotted for NeuroD1, TrkB and GAPDH (as loading control). b) NeuroD1 and TrkB were transiently knocked down in melanoma or prostate cells in 96 well format for 3 days. Cell were then assayed for BrDu incorporation.

**Figure 3. Chromatin Immunoprecipitation (ChIP) of NeuroD1 in melanoma and prostate cells**

a) ChIP of NeuroD1 on *NTRK2* promoter in melanoma and prostate cell lines. Two E-boxes sites examined at -292 and -337. IgG and NeuroD1 immunoprecipitations values were compared to input, then plotted as % chromatin fold enrichment.

**Figure 4. TrkB knockdown**

TrkB was transiently knocked down in melanoma or prostate cells for 3 days. Lysates were immunoblotted for TrkB and GAPDH (as loading control).

Supplemental Table 1

## Genes up-regulated along with NeuroD1

| Affy ID     | Accession    | Unigene Build 219 | UCSC Cytoband | High Neuro D1 vs Low Neuro D1 | T-test | 20 significant | Gene Name                                                                         | Symbol  |
|-------------|--------------|-------------------|---------------|-------------------------------|--------|----------------|-----------------------------------------------------------------------------------|---------|
| 206282_at   | NM_002500    | Hs.709709         | 2q31.3        | 4.36                          | 0.000  | U              | Neurogenic differentiation 1                                                      | NEUROD1 |
| 228915_at   | NM_080760    | Hs.129452         | 13q21.33      | 3.28                          | 0.000  | U              | Dachshund homolog 1 (Drosophila)                                                  | DACH1   |
| 213847_at   | NM_006262    | Hs.37044          | 12q13.12      | 3.97                          | 0.002  | U              | Peripherin                                                                        | PRPH    |
| 218625_at   | NM_016588    | Hs.103291         | 6p25.1        | 2.17                          | 0.003  | U              | Neuritin 1                                                                        | NRN1    |
| 212764_at   | NM_001128128 | Hs.124503         | 10p11.22      | 1.49                          | 0.002  | U              | Zinc finger E-box binding homeobox 1                                              | ZEB1    |
| 207144_s_at | NM_004143    | Hs.40403          | Xq13.1        | 1.98                          | 0.000  | U              | Cbp/p300-interacting transactivator, with Glu/Asp-rich carboxy-terminal domain, 1 | CITED1  |
| 213200_at   | NM_003179    | Hs.632804         | Xp11.23       | 1.65                          | 0.001  | U              | Synaptophysin                                                                     | SYP     |
| 221914_at   | NM_133499    | Hs.225936         | Xp11.23       | 1.74                          | 0.000  | U              | Synapsin I                                                                        | SYN1    |
| 212843_at   | NM_181351    | Hs.503878         | 11q23.2       | 1.04                          | 0.017  | U              | Neural cell adhesion molecule 1                                                   | NCAM1   |
| 204584_at   | NM_001143963 | Hs.522818         | Xq28          | 2.82                          | 0.001  | U              | L1 cell adhesion molecule                                                         | L1CAM   |
| 204697_s_at | NM_001275    | Hs.150793         | 14q32.12      | 2.41                          | 0.000  | U              | Chromogranin A (parathyroid secretory protein 1)                                  | CHGA    |
| 204260_at   | NM_001819    | Hs.516874         | 20p12.3       | 1.93                          | 0.000  | U              | Chromogranin B (secretogranin 1)                                                  | CHGB    |
| 204681_s_at | NM_012294    | Hs.174768         | 7p15.3        | 2.32                          | 0.001  | U              | Rap guanine nucleotide exchange factor (GEF) 5                                    | RAPGEF5 |
| 206502_s_at | NM_002196    | Hs.89584          | 20p11.23      | 1.25                          | 0.001  | U              | Insulinoma-associated 1                                                           | INSM1   |

**Supplemental Table 2** Genes down-regulated with NeuroD1

|             |              |           |          |       |       |   |                                                                                 |          |
|-------------|--------------|-----------|----------|-------|-------|---|---------------------------------------------------------------------------------|----------|
| 201131_s_at | NM_004360    | Hs.461086 | 16q22.1  | -4.37 | 0.001 | D | Cadherin 1, type 1, E-cadherin (epithelial)                                     | CDH1     |
| 208712_at   | NM_053056    | Hs.523852 | 11q13.3  | -2.19 | 0.127 |   | Cyclin D1                                                                       | CCND1    |
| 201005_at   | NM_001769    | Hs.114286 | 12p13.31 | -3.29 | 0.006 | D | CD9 molecule                                                                    | CD9      |
| 209835_x_at | NM_001001392 | Hs.502328 | 11p13    | -2.99 | 0.010 | D | CD44 molecule (Indian blood group)                                              | CD44     |
| 207606_s_at | NM_018287    | Hs.499264 | 10p11.22 | -1.25 | 0.003 | D | Rho GTPase activating protein 12                                                | ARHGAP12 |
| 205016_at   | NM_003236    | Hs.170009 | 2p13.3   | -2.16 | 0.011 | D | Transforming growth factor, alpha                                               | TGFA     |
| 201506_at   | NM_000358    | Hs.369397 | 5q31.1   | -5.40 | 0.002 | D | Transforming growth factor, beta-induced, 68kDa                                 | TGFBI    |
| 202431_s_at | NM_002467    | Hs.202453 | 8q24.21  | 2.49  | 0.368 | D | v-myc myelocytomatosis viral oncogene homolog (avian)                           | MYC      |
| 209757_s_at | NM_005378    | Hs.25960  | 2p24.3   | -2.48 | 0.694 | D | V-myc myelocytomatosis viral related oncogene, neuroblastoma derived (avian)    | MYCN     |
| 214058_at   | NM_001033082 | Hs.437922 | 1p34.2   | -2.66 | 0.727 | D | V-myc myelocytomatosis viral oncogene homolog 1, lung carcinoma derived (avian) | MYCL1    |

# Supplemental 1

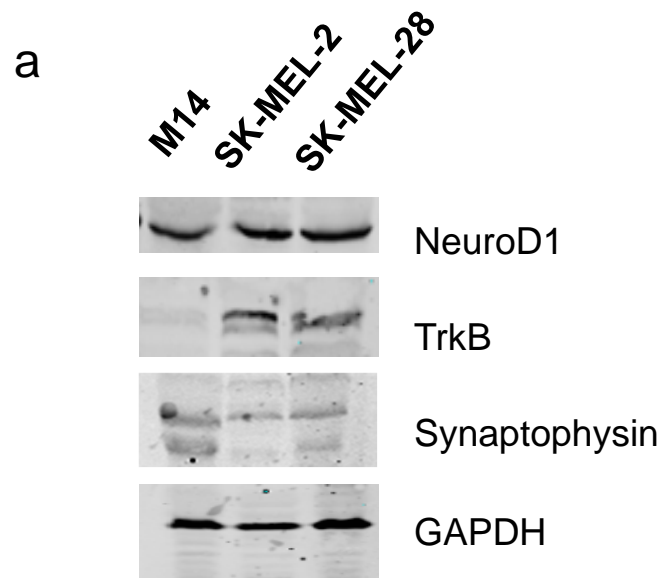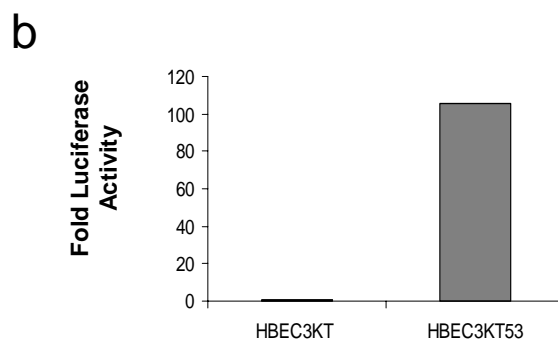

# Supplemental 2

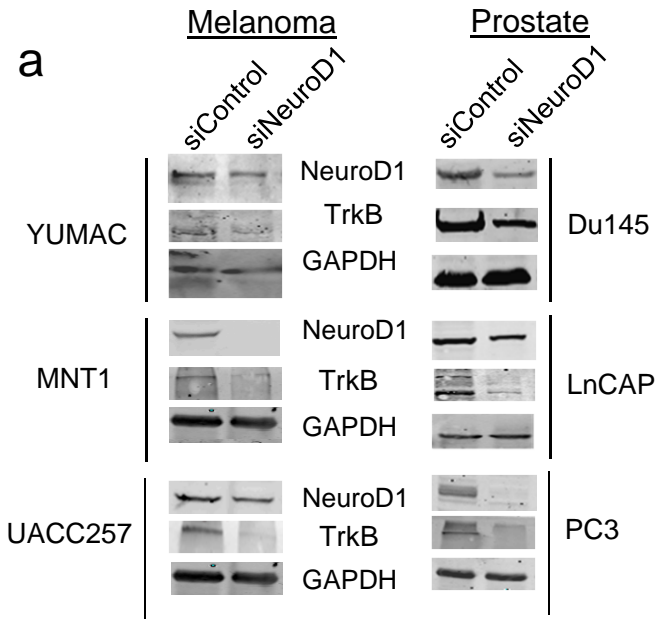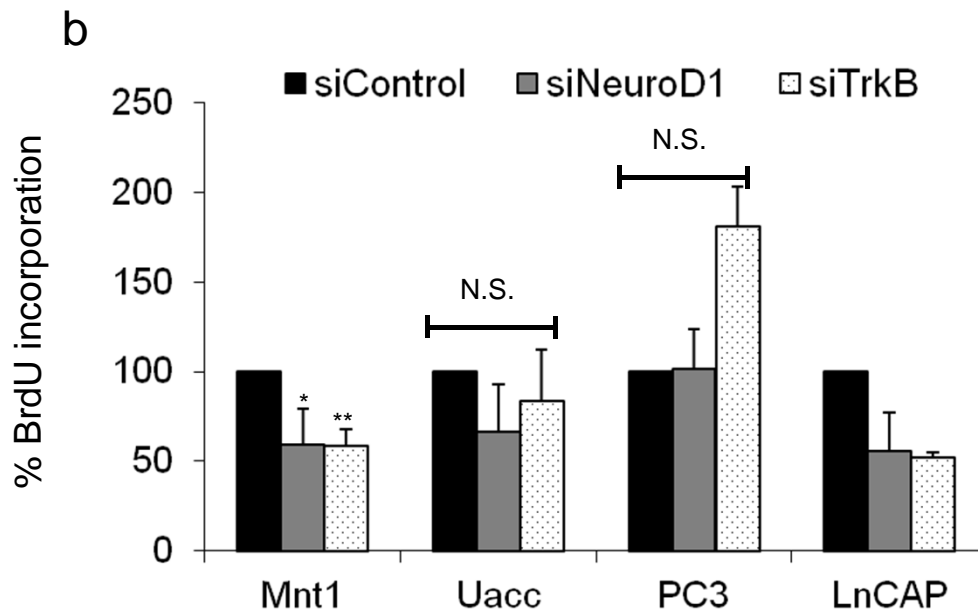

### Supplemental 3

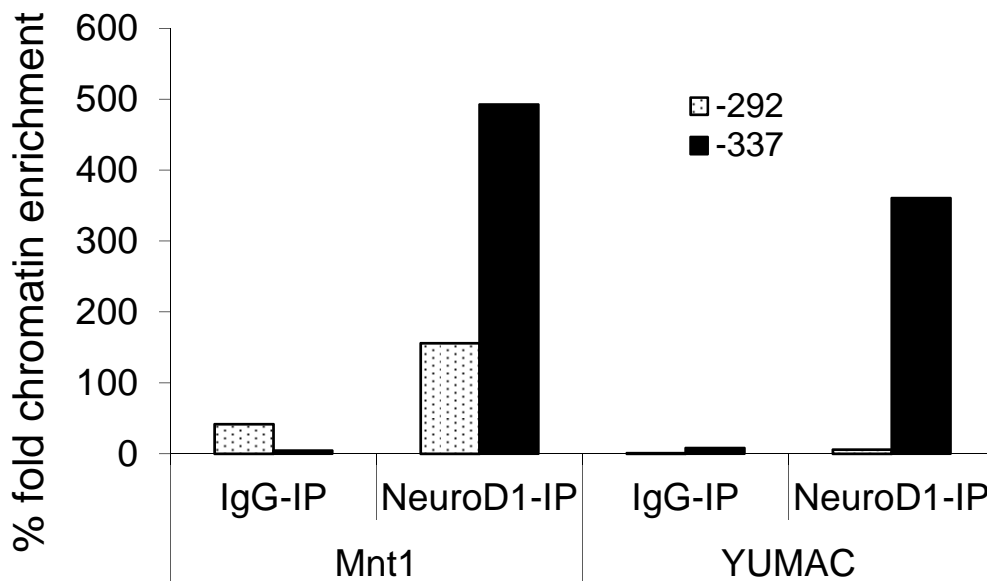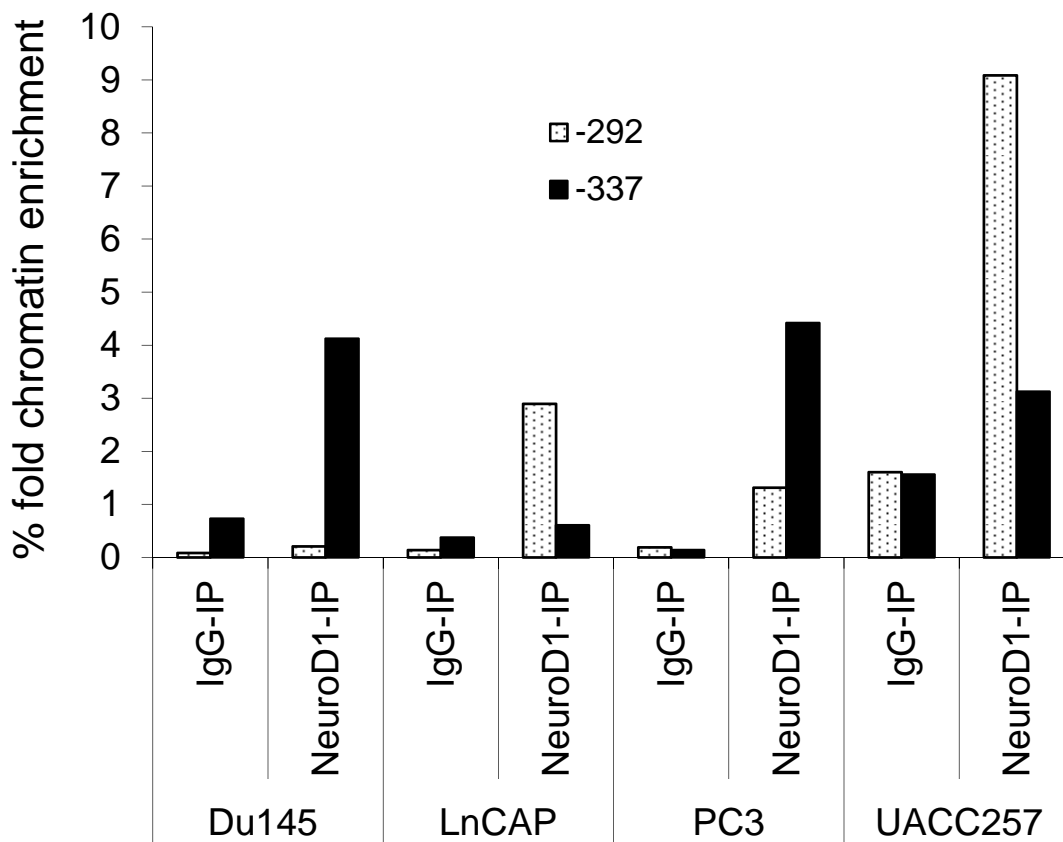

# Supplemental 4

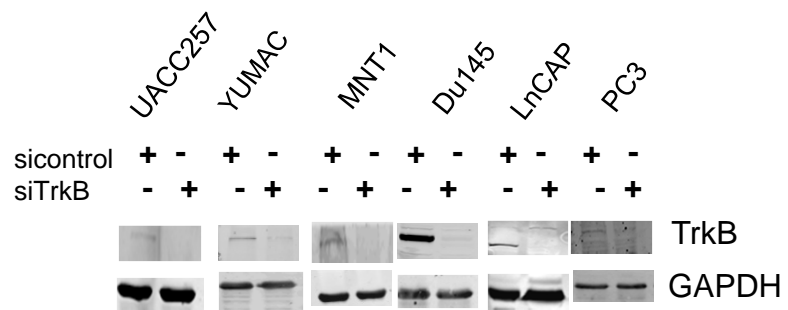

Supplement: oncsis201324x1.pdf [file oncsis201324x1.pdf]
